# Supplementary material for: Mechanically Strong and Tailorable Polyimide Aerogels Prepared with Novel Silicone Polymer Crosslinkers
Source: MDPI journal article supplement (doi:10.3390/gels8010057), 2022-01-12
Supplement: s1 [file s1]

Article

# Mechanically Strong and Tailorable Polyimide Aerogels Prepared with Novel Silicone Polymer Crosslinkers

Zhongxin Zhang <sup>1</sup>, Yurui Deng <sup>1</sup>, Zhiyi Lun <sup>1</sup>, Xiao Zhang <sup>1,2</sup>, Mingyuan Yan <sup>1</sup>, Pan He <sup>1</sup>, Caihong Li <sup>1</sup> and Yuelel Pan <sup>1,\*</sup>

Supplementary Materials

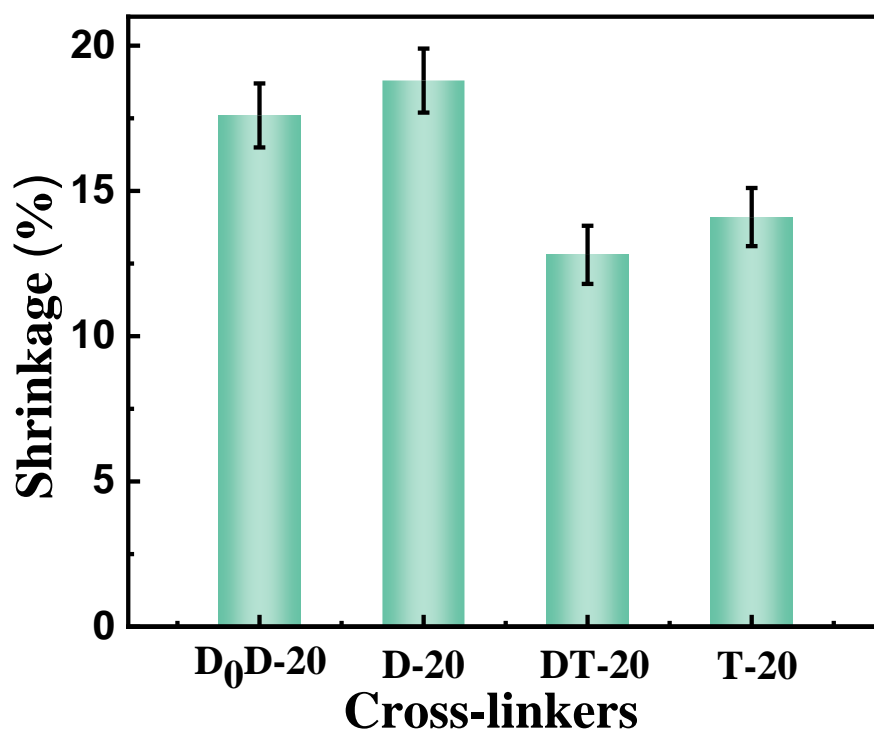

**Figure S1.** The shrinkage of aerogels cross-linked with silicone polymers prepared from different precursors.

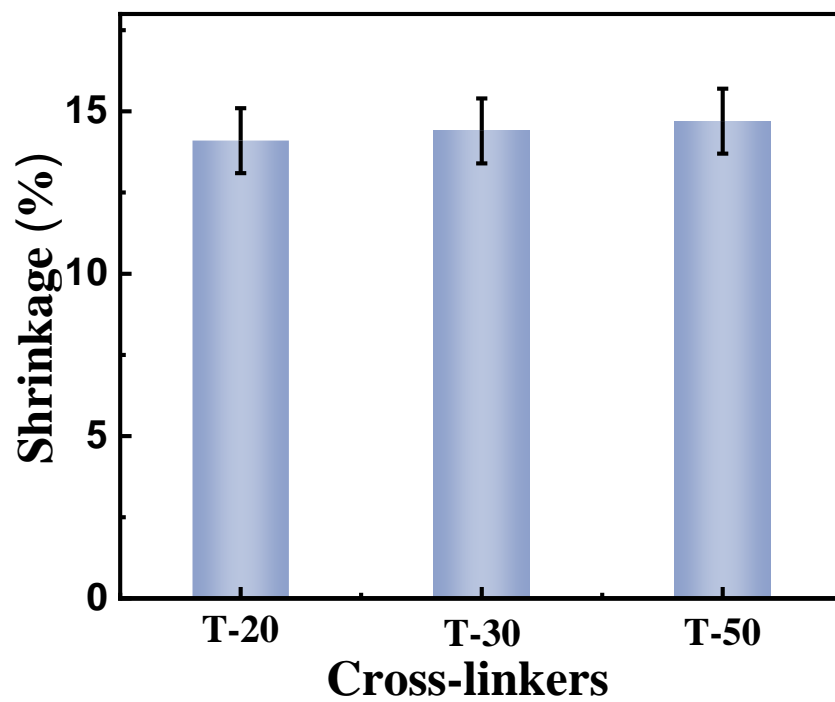

**Figure S2.** The shrinkage of aerogels prepared with silicone polymers of different degrees of polymerisation.

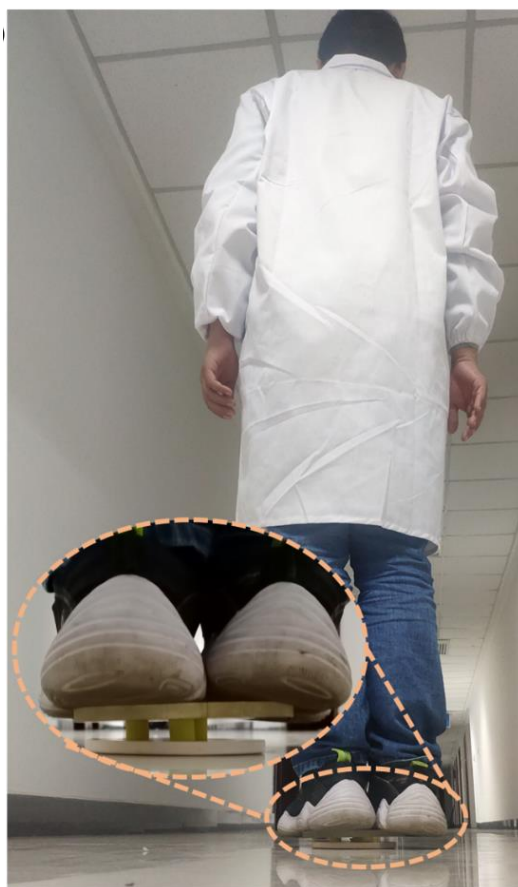

**Figure S3.** Diagram of aerogel carrying adults.

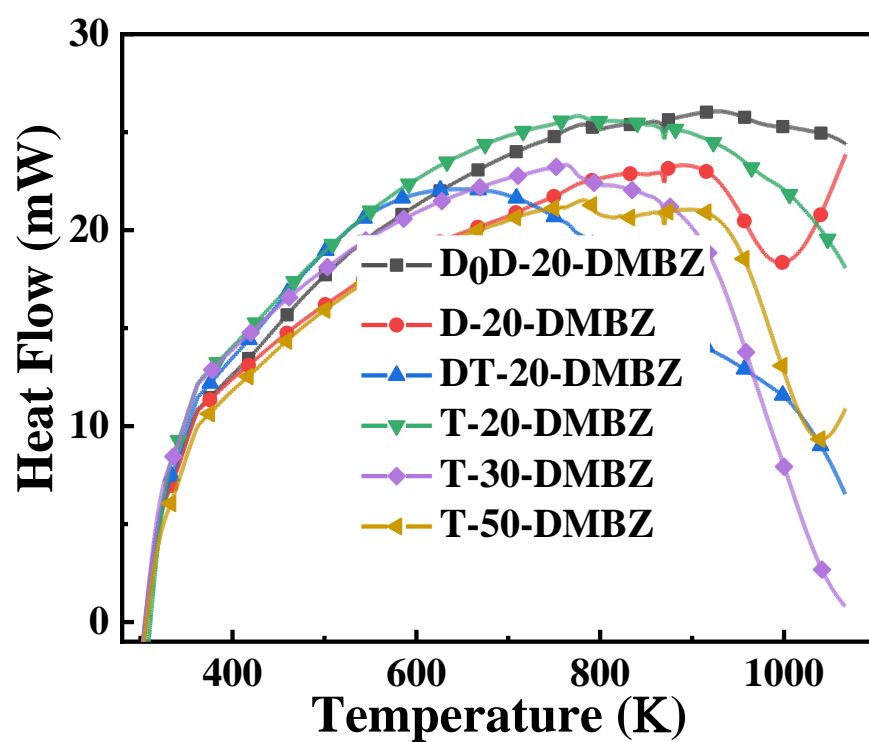

**Figure S4.** The heat flow curves of aerogels cross-linked with silicone polymers prepared from different precursors.
